# Supplementary material for: Subtle cognitive impairments in memory, attention, and executive functioning in patients with post-COVID syndrome and their relationships with clinical variables and subjective complaints
Source: bioRxiv or medRxiv preprint supplement (doi:10.1101/2022.05.23.22275442), 2022-10-24
Supplement: Supplementary file [file media-1.pdf]

**Subtle cognitive impairments in memory, attention, and executive functioning in patients with post-COVID syndrome and their relationships with clinical variables and subjective complaints**

- 5 Kozik, V., Reuken, P., Utech, I., Gramlich, J., Stallmach, Z., Demeyere, N., Rakers, F., Schwab, M., Stallmach, A., Finke, K.

**Supplemental material**

- 10 S1: Performance on the OCS-Plus domain scales in patients with low versus high complaints of cognitive symptoms

| OCS-Plus task                     | Low complaints |        |        |       |      | High complaints |        |        |       |      | Wilcoxon rank sum test |       |
|-----------------------------------|----------------|--------|--------|-------|------|-----------------|--------|--------|-------|------|------------------------|-------|
|                                   | n              | Mean   | Median | SD    | SEM  | n               | Mean   | Median | SD    | SEM  | W                      | p     |
| Naming and Semantic Understanding | 78             | 7.87   | 8.00   | 0.37  | 0.04 | 213             | 7.83   | 8.00   | 0.45  | 0.03 | 8599                   | 0.224 |
| Memory Encoding                   | 75             | 9.49   | 10.00  | 0.79  | 0.09 | 207             | 9.43   | 10.00  | 0.73  | 0.05 | 8245.5                 | 0.182 |
| Delayed Memory                    | 75             | 8.35   | 9.00   | 1.62  | 0.19 | 215             | 7.89   | 8.00   | 1.79  | 0.12 | 9214                   | 0.03* |
| Praxis                            | 77             | 102.51 | 105.00 | 12.25 | 1.40 | 213             | 103.14 | 105.00 | 8.32  | 0.57 | 8608.5                 | 0.259 |
| Executive Functioning             | 75             | 76.87  | 89.86  | 27.97 | 3.23 | 211             | 83.21  | 92.86  | 23.29 | 1.60 | 6889                   | 0.959 |
| Attention                         | 76             | 58.45  | 59.00  | 1.59  | 0.18 | 210             | 58.19  | 59.00  | 1.75  | 0.12 | 8628                   | 0.141 |

*Note.* Med. = Median; SD = standard deviation; SEM = standard error of the mean; r = effect size; \* = significant before correction; \*\* = significant after correction

15 S2: Group-level descriptive statistics for delayed memory, attention, and executive functioning, stratified by presence of comorbidity, within patient group

**Delayed Memory**

| <b>Hypertension</b> |     |     |    |     |     | <b>Coronary heart disease</b> |   |     |    |     |     | <b>Chronic heart failure</b> |   |     |    |     |    | <b>Diabetes mellitus</b> |   |     |    |   |     | <b>Psychiatric disorders</b> |   |     |    |   |     |   |   |    |   |   |    |
|---------------------|-----|-----|----|-----|-----|-------------------------------|---|-----|----|-----|-----|------------------------------|---|-----|----|-----|----|--------------------------|---|-----|----|---|-----|------------------------------|---|-----|----|---|-----|---|---|----|---|---|----|
| 0                   |     |     | 1  |     |     | 0                             |   |     | 1  |     |     | 0                            |   |     | 1  |     |    | 0                        |   |     | 1  |   |     | 0                            |   |     | 1  |   |     |   |   |    |   |   |    |
| n                   | M   | SD  | n  | M   | SD  | n                             | M | SD  | n  | M   | SD  | n                            | M | SD  | n  | M   | SD | n                        | M | SD  | n  | M | SD  | n                            | M | SD  | n  | M | SD  | n | M | SD | n | M | SD |
| 183                 | 8.2 | 1.8 | 96 | 7.6 | 1.8 | 268                           | 8 | 1.7 | 11 | 6.9 | 2.6 | 268                          | 8 | 1.8 | 11 | 7.6 | 2  | 265                      | 8 | 1.8 | 14 | 7 | 1.7 | 239                          | 8 | 1.8 | 40 | 8 | 1.7 |   |   |    |   |   |    |

20 **Attention**

| <b>Hypertension</b> |    |      |    |      |      | <b>Coronary heart disease</b> |      |      |    |    |    | <b>Chronic heart failure</b> |      |      |    |      |      | <b>Diabetes mellitus</b> |      |      |    |      |      | <b>Psychiatric disorders</b> |      |      |    |      |      |   |   |    |   |   |    |
|---------------------|----|------|----|------|------|-------------------------------|------|------|----|----|----|------------------------------|------|------|----|------|------|--------------------------|------|------|----|------|------|------------------------------|------|------|----|------|------|---|---|----|---|---|----|
| 0                   |    |      | 1  |      |      | 0                             |      |      | 1  |    |    | 0                            |      |      | 1  |      |      | 0                        |      |      | 1  |      |      | 0                            |      |      | 1  |      |      |   |   |    |   |   |    |
| n                   | M  | SD   | n  | M    | SD   | n                             | M    | SD   | n  | M  | SD | n                            | M    | SD   | n  | M    | SD   | n                        | M    | SD   | n  | M    | SD   | n                            | M    | SD   | n  | M    | SD   | n | M | SD | n | M | SD |
| 181                 | 82 | 24.6 | 94 | 80.9 | 25.4 | 264                           | 81.8 | 24.6 | 11 | 78 | 30 | 264                          | 81.5 | 24.8 | 11 | 82.7 | 25.3 | 261                      | 82.1 | 24.3 | 14 | 71.6 | 31.4 | 236                          | 82.4 | 24.4 | 39 | 76.4 | 27.1 |   |   |    |   |   |    |

**Executive Functioning**

| <b>Hypertension</b> |       |      |    |       |      | <b>Coronary heart disease</b> |       |      |    |       |      | <b>Chronic heart failure</b> |      |      |    |       |     | <b>Diabetes mellitus</b> |       |      |    |       |      | <b>Psychiatric disorders</b> |       |      |    |       |      |   |   |    |   |   |    |
|---------------------|-------|------|----|-------|------|-------------------------------|-------|------|----|-------|------|------------------------------|------|------|----|-------|-----|--------------------------|-------|------|----|-------|------|------------------------------|-------|------|----|-------|------|---|---|----|---|---|----|
| 0                   |       |      | 1  |       |      | 0                             |       |      | 1  |       |      | 0                            |      |      | 1  |       |     | 0                        |       |      | 1  |       |      | 0                            |       |      | 1  |       |      |   |   |    |   |   |    |
| n                   | M     | SD   | n  | M     | SD   | n                             | M     | SD   | n  | M     | SD   | n                            | M    | SD   | n  | M     | SD  | n                        | M     | SD   | n  | M     | SD   | n                            | M     | SD   | n  | M     | SD   | n | M | SD | n | M | SD |
| 180                 | 58.27 | 1.67 | 95 | 58.14 | 1.82 | 264                           | 58.25 | 1.72 | 11 | 57.64 | 1.86 | 264                          | 58.3 | 1.65 | 11 | 56.45 | 2.5 | 262                      | 58.27 | 1.69 | 13 | 57.15 | 2.15 | 236                          | 58.27 | 1.71 | 39 | 57.92 | 1.77 |   |   |    |   |   |    |

Note: 0 = comorbidity not present; 1 = comorbidity present; n = number of observations per group; M = mean; SD = standard deviation

25 S3: Wilcoxon Rank Sum Test with Benjamini-Hochberg False Discovery Rate correction for the domains of delayed memory, attention, and executive functioning for each comorbidity

| Domain                | Comorbidity            | W       | p     | p_adj  |
|-----------------------|------------------------|---------|-------|--------|
| Delayed Memory        | Hypertension           | 10660.5 | 0.003 | 0.045* |
| Executive Functioning | Chronic heart failure  | 2126.5  | 0.008 | 0.060  |
| Delayed Memory        | Diabetes mellitus      | 2482    | 0.030 | 0.150  |
| Executive Functioning | Diabetes mellitus      | 2259    | 0.042 | 0.158  |
| Attention             | Diabetes mellitus      | 2262.5  | 0.117 | 0.340  |
| Executive Functioning | Coronary heart disease | 1786    | 0.186 | 0.340  |
| Delayed Memory        | Coronary heart disease | 1811    | 0.191 | 0.340  |
| Executive Functioning | Psychiatric disorders  | 5178.5  | 0.200 | 0.340  |
| Attention             | Psychiatric disorders  | 5162.5  | 0.204 | 0.340  |
| Attention             | Coronary heart disease | 1617.5  | 0.505 | 0.678  |
| Attention             | Chronic heart failure  | 1286.5  | 0.505 | 0.678  |
| Delayed Memory        | Chronic heart failure  | 1624    | 0.561 | 0.678  |
| Attention             | Hypertension           | 8832    | 0.588 | 0.678  |
| Executive Functioning | Hypertension           | 8785.5  | 0.701 | 0.751  |
| Delayed Memory        | Psychiatric disorders  | 4735    | 0.924 | 0.924  |

Note: p\_adj. = FDR-corrected p-value. \* = p-value survived correction.

30

S4: Coefficient-level estimates for models fitted to estimate variation in Delayed Memory performance, taking hypertension into account

| <i>Dependent variable:</i>  |                                  |
|-----------------------------|----------------------------------|
| Delayed Memory              |                                  |
| <i>OLS</i>                  |                                  |
| Intercept                   | 9.542*** (8.383, 10.789)         |
| Hospitalisation (inpatient) | <b>-0.701** (-1.205, -0.265)</b> |
| Age                         | <b>-0.024* (-0.042, -0.005)</b>  |
| Days since infection        | 0.002* (0.000, 0.003)            |
| FAS                         | -0.018 (-0.052, 0.013)           |
| PHQ-9                       | -0.009 (-0.060, 0.042)           |
| Hypertension                | -0.133 (-0.321, 0.239)           |
| Observations                | 279                              |
| R <sup>2</sup>              | 0.097                            |
| Adjusted R <sup>2</sup>     | 0.077                            |
| Residual Std. Error         | 1.701 (df = 272)                 |
| F Statistic                 | 4.882*** (df = 6; 272)           |

Note: Coefficients and confidence intervals (nonparametric bootstrap, in parentheses), bolded: significant estimates, with bootstrap confidence intervals not overlapping zero; \*  $p < 0.05$ ; \*\*  $p < 0.01$ ; \*\*\*  $p < 0.001$
